# Supplementary material
Source: PubMed Central journal article supplement (PMC1805539)

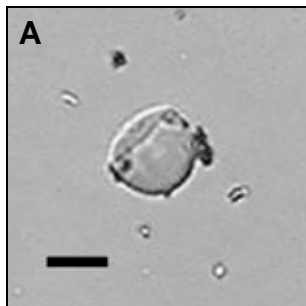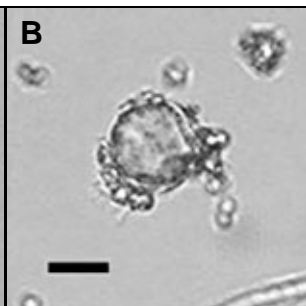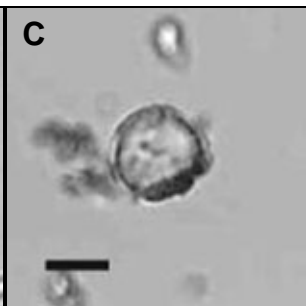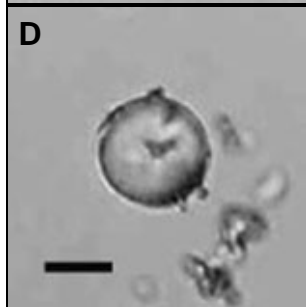

Supplement: pnas_0611605104_1.pdf [file pnas_0611605104_1.pdf]

**A**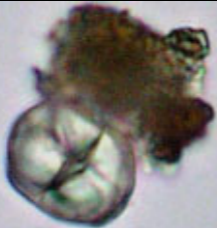**B**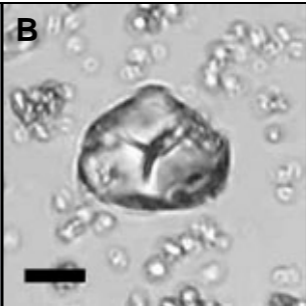

Supplement: pnas_0611605104_2.pdf [file pnas_0611605104_2.pdf]

**A**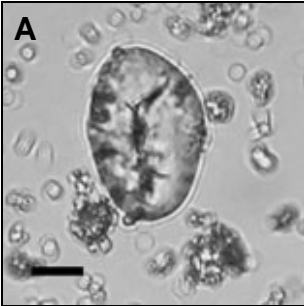**B**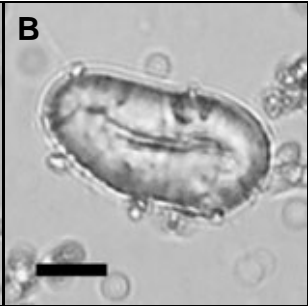

Supplement: pnas_0611605104_3.pdf [file pnas_0611605104_3.pdf]

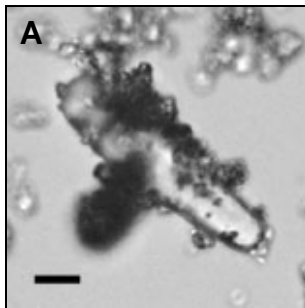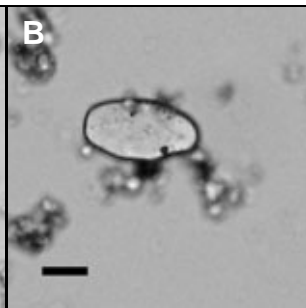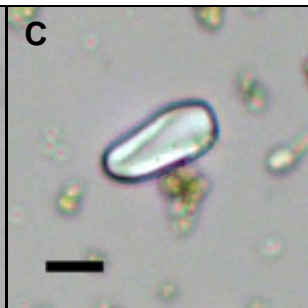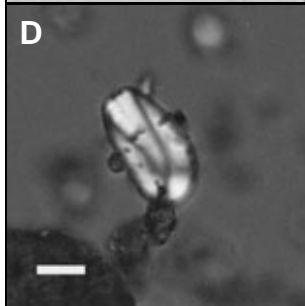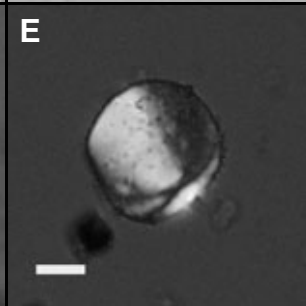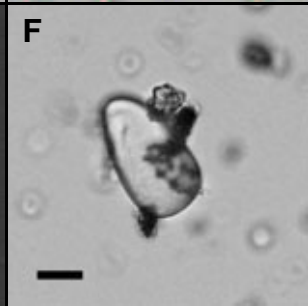

Supplement: pnas_0611605104_4.pdf [file pnas_0611605104_4.pdf]

**A**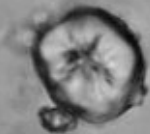**B**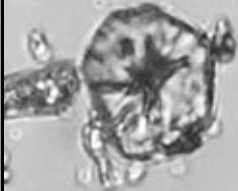**C**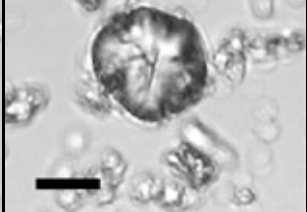

Supplement: pnas_0611605104_5.pdf [file pnas_0611605104_5.pdf]

**A**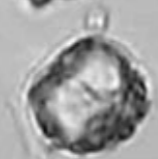**B**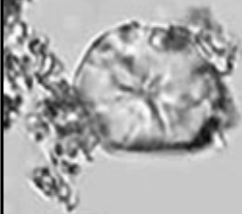

Supplement: pnas_0611605104_6.pdf [file pnas_0611605104_6.pdf]

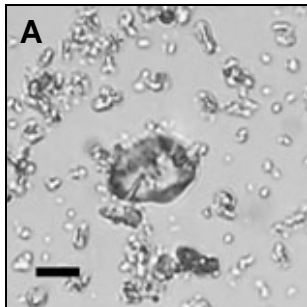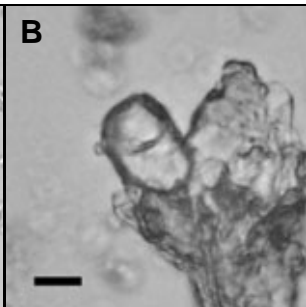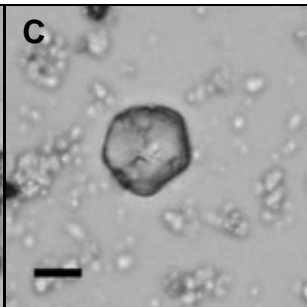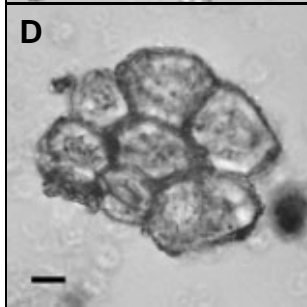

Supplement: pnas_0611605104_7.pdf [file pnas_0611605104_7.pdf]
